# Supplementary material for: Upgrading of anisole using in situ generated hydrogen in pin to plate pulsed corona discharge
Source: Royal Society of Chemistry journal article supplement (doi:10.1039/c6ra21417g), 2016-01-01
Supplement: c6ra21417g1.pdf [file c6ra21417g1.pdf]

A sample numerical details of products and their selectivity are presented in table S1. The operating and design parameters in which the experiment was performed is presented in table S2.

Table S1: A sample numerical details of products and their selectivity

| Products                   | Mole percentage | Selectivity | Selectivity (%) |
|----------------------------|-----------------|-------------|-----------------|
| Benzene                    | 8.10            | 0.12        | 11.91           |
| cyclohexane                | 0.00            | 0.00        | 0.00            |
| Toluene                    | 0.10            | 0.00        | 0.15            |
| P-xylene                   | 3.05            | 0.04        | 4.49            |
| O-xylene                   | 0.10            | 0.00        | 0.15            |
| Cyclohexanol               | 0.00            | 0.00        | 0.00            |
| Anisole                    | 32.00           | 0.47        | 47.06           |
| Phenole                    | 32.20           | 0.47        | 47.35           |
| 2-methylanisole            | 0.00            | 0.00        | 0.00            |
| 4-methylanisole            | 0.50            | 0.01        | 0.74            |
| 2-methylphenol (o-cresole) | 10.30           | 0.15        | 15.15           |
| 4-methylphenol (p-cresole) | 4.05            | 0.06        | 5.96            |
| Guaiacol                   | 0.00            | 0.00        | 0.00            |
| 2,6-dimethylphenol         | 2.04            | 0.03        | 3.00            |
| 2,4-dimethylphenol         | 3.20            | 0.05        | 4.71            |
| 3,5-dimethylphenol         | 0.50            | 0.01        | 0.74            |
| 2,3-dimethylphenol         | 0.00            | 0.00        | 0.00            |
| 3,4-dimethylphenol         | 0.30            | 0.00        | 0.44            |
| catechol                   | 0.00            | 0.00        | 0.00            |
| 2,3,6trimethylphenol       | 0.50            | 0.01        | 0.74            |
| 2,4,5trimethylphenol       | 1.00            | 0.01        | 1.47            |
| 2,4,6trimethylphenol       | 0.00            | 0.00        | 0.00            |
| 3,4,5trimethylphenol       | 0.40            | 0.01        | 0.59            |
| 2,3,5,6tetramethylphenol   | 1.10            | 0.02        | 1.62            |
| 2,3,4,6tetramethylphenol   | 0.50            | 0.01        | 0.74            |
| <b>Summation</b>           | <b>100.00</b>   |             |                 |
| <b>Summary</b>             |                 |             |                 |
| mehylanisole               | 0.50            | 0.01        | 0.74            |
| methylphenol               | 14.35           | 0.21        | 21.10           |
| dimethylphenol             | 6.04            | 0.09        | 8.88            |
| trimethylphenol            | 1.90            | 0.03        | 2.79            |
| tetramethylphenol          | 1.60            | 0.02        | 2.35            |
| <b>BTX</b>                 | <b>11.35</b>    | <b>0.17</b> | <b>16.69</b>    |

Table S2: Operating and design parameters

| <b>Applied voltage (kV)</b> | <b>PRF (kHz)</b> | <b>Pin number</b> | <b>Gap distance (mm)</b> | <b>Ar Flow rate (ml/min)</b> | <b>Plate electrode diameter (mm)</b> |
|-----------------------------|------------------|-------------------|--------------------------|------------------------------|--------------------------------------|
| 10                          | 20               | 6                 | 5                        | 500                          | 20-35                                |
